# Supplementary material
Source: PubMed Central journal article supplement (PMC6594858)

## Supplementary Figures

Supplementary Figure 1. Structural involvement in balance as indexed by average number of findings per paper. The finding per paper average was operationally defined as the frequency of findings in a region as a function of the number of papers that could have reported a significant finding in the region (i.e. papers using a VBM approach or those with an ROI encompassing the region). A) Average number of findings per paper implicating each brain region in balance. B-G) Average number of findings per paper of structures within each region that had a total of 1 or more findings per paper. Structures that contributed to 10% or more of that region's total number of findings per paper are reported. Remaining structures that contributed to less than 10% of the region's total number of findings are not listed but can be found in Supplementary Table 1. GM, Gray Matter; WM, White Matter

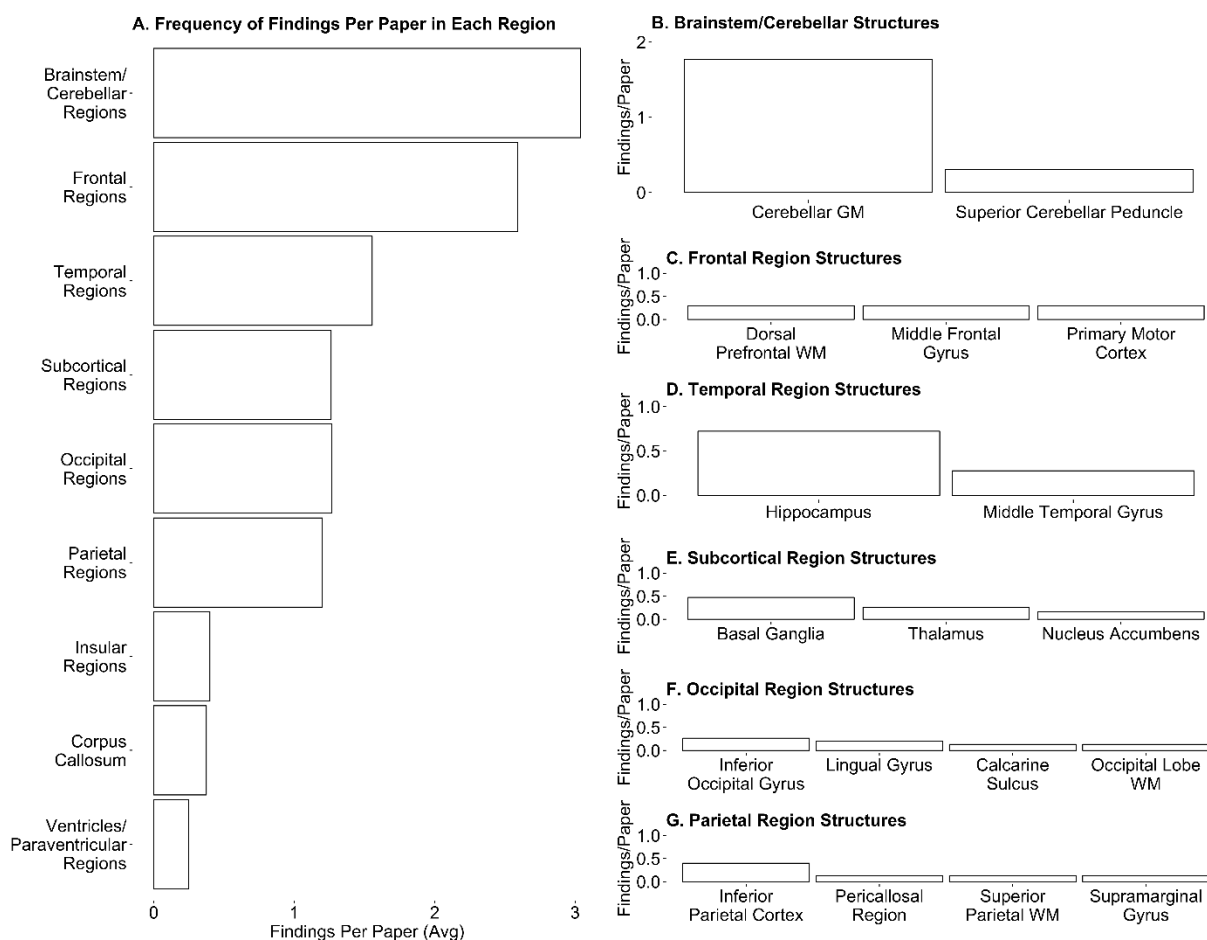

Supplementary Figure 2. Frequency of specific parameters used in each study. This figure differs from Figure 2 in that it looks at frequencies at the study level and not at the findings level. A) Frequency of studies that indicated findings in each region and used assessment or intervention study designs. B) Frequency of studies that indicated findings in each region and used ROI or VBM analysis technique. C) Frequency of studies that indicated findings in each region and used static or dynamic measures of balance. Studies that assessed balance using both static and dynamic metrics or a composite score of both static and dynamic balance are also noted. D) Frequency of studies that indicated findings in each region and looked at balance in clinical versus non-clinical populations. Studies that presented findings in both clinical and non-clinical populations are also noted.

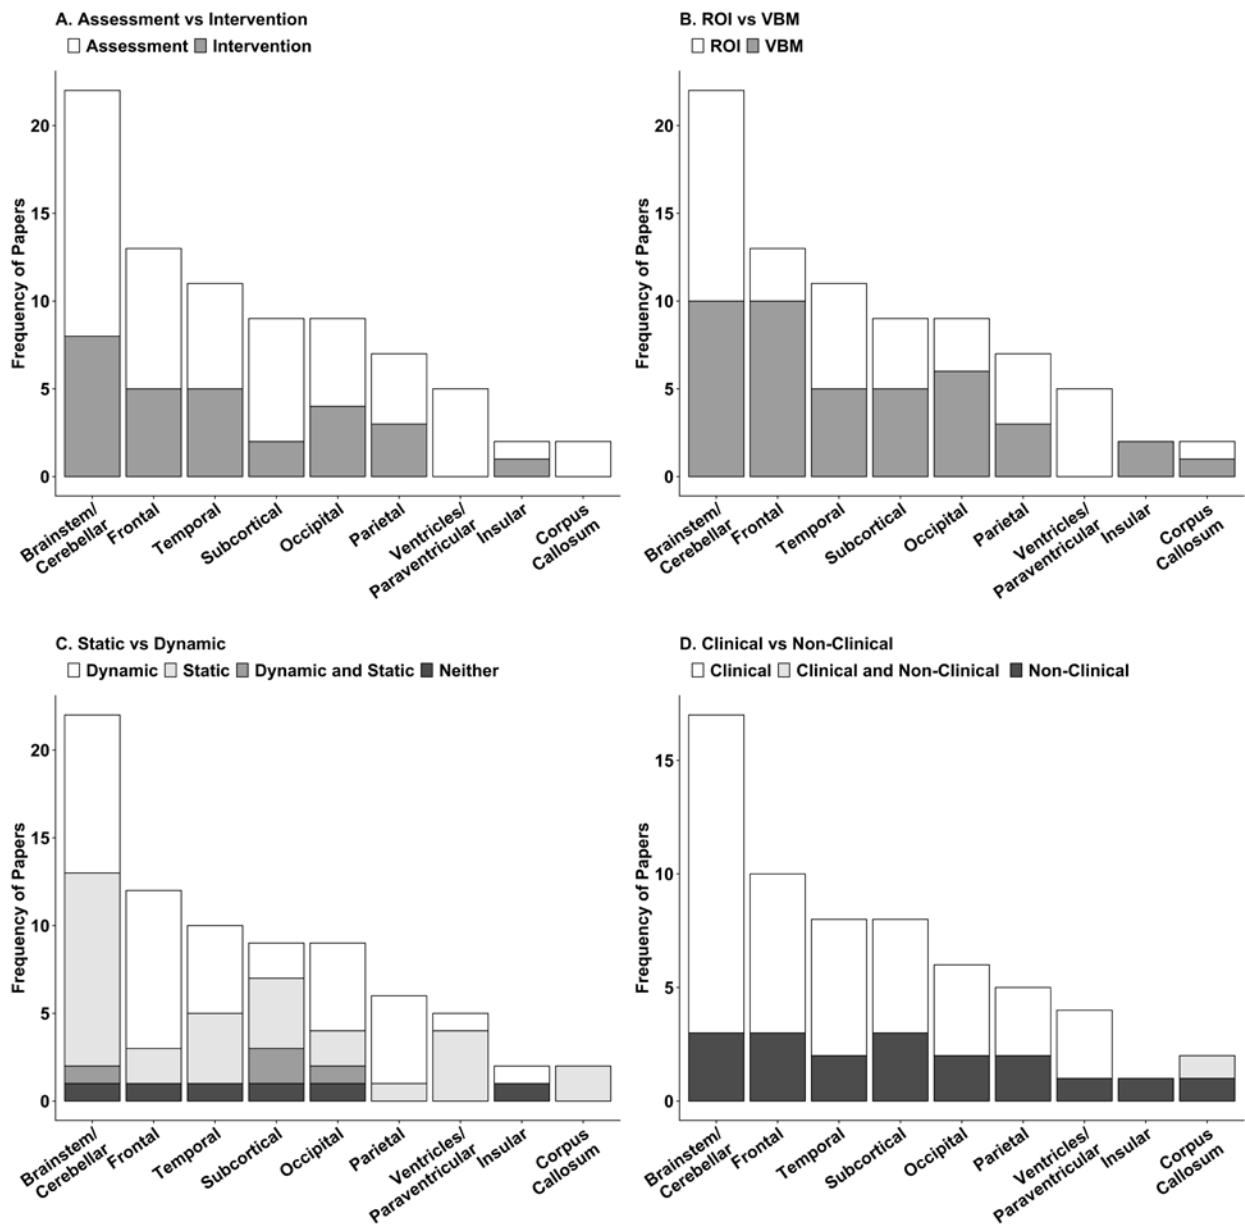

Supplement: NIHMS1529747-supplement-1.pdf [file NIHMS1529747-supplement-1.pdf]
